# Supplementary material
Source: PubMed Central journal article supplement (PMC10184868)
Supplement: NIHMS1897851-supplement-1.pdf [file NIHMS1897851-supplement-1.pdf]

Supplemental Table 1: Current Procedural Terminology definitions of core domain and subspecialty surgeries.

| Subspecialty Surgeries                                                                                                                                                                                                                                                                                                                                                                                                                                                                           | Core Domain Surgeries                                                                                                                                                                                                                                               |
|--------------------------------------------------------------------------------------------------------------------------------------------------------------------------------------------------------------------------------------------------------------------------------------------------------------------------------------------------------------------------------------------------------------------------------------------------------------------------------------------------|---------------------------------------------------------------------------------------------------------------------------------------------------------------------------------------------------------------------------------------------------------------------|
| <u>Retina</u><br>Repair of retinal detachment: 67107, 67113, 67108<br>Pars plana vitrectomy: 67036, 67039, 67040, 67041, 67042, 67043<br>Silicone oil removal: 67121                                                                                                                                                                                                                                                                                                                             | <u>Cataract extraction</u><br>66984, 66982                                                                                                                                                                                                                          |
| <u>Cornea</u><br>Penetrating keratoplasty: 65730, 65750, 65755<br>Endothelial keratoplasty: 65756<br>Anterior lamellar keratoplasty: 65710                                                                                                                                                                                                                                                                                                                                                       | <u>Pterygium/conjunctival procedures</u><br>65420, 65426, 66130, 66225, 68100, 65770, 65865, 65870, 65875, 65880, 65900, 66250, 68110, 68115, 68130, 68320, 68325, 68326, 68328, 68330, 68335, 68340, 68360, 68362, 68399, 65780, 65800, 66220, 65400, 65410, 65710 |
| <u>Glaucoma</u><br>Trabeculectomy: 66170, 66172<br>Aqueous shunt implantation: 66185, 66180, 66179                                                                                                                                                                                                                                                                                                                                                                                               | <u>Eyelid laceration repairs</u><br>12011, 12013, 12014, 12015, 12016, 12017, 12018, 12020, 12051, 12052, 12053, 12054, 12055, 12056, 12057, 13151, 13152, 13153, 13160, 14060, 14061, 15120, 15121, 15260, 15261, 15576, 15630, 67930, 67935, 68700, 68815         |
| <u>Oculoplastics</u><br>Enucleation: 65101, 65103, 65105<br>Exenteration: 65110, 65112, 65114<br>Ocular implant procedures: 65125, 65130, 65135, 65140, 65150, 65155, 65175<br>Orbitotomy: 67400, 67405, 67412, 67413, 67414, 67415, 67420, 67430, 67440, 67445, 67450<br>Eyelid procedures: 67900, 67901, 67902, 67906, 67908, 67909, 67911, 67915, 67916, 67917, 67922, 67923, 67924, 67950, 67961, 67966<br>Lacrimal gland procedures: 68500, 68505, 68510, 68520, 68525, 68530, 68540, 68550 | <u>Chalazion excisions</u><br>67800, 67801, 67805, 67808                                                                                                                                                                                                            |
| <u>Neuro-Ophthalmology/Pediatrics</u><br>Strabismus surgery: 67311, 67312, 67314, 67316, 67318, 67320, 67331, 67332, 67334, 67335, 67340                                                                                                                                                                                                                                                                                                                                                         | <u>Ptosis repairs/blepharoplasties</u><br>67900, 67901, 67902, 67903, 67904, 67906, 67908, 67909, 67974, 67999, 67950, 15115, 15135, 15155, 15731, 15822, 15823, 67961, 67966, 67971, 67973, 67975, 15820, 15821                                                    |

Supplemental Table 2: Relative risk of performing pterygium/conjunctival surgery as well as subspecialty surgery, stratified by provider primary subspecialty

|                      | Retina<br>(N = 1224) |            |         | Oculoplastics<br>(N = 609) |            |         | Cornea<br>(N = 338) |            |         | Glaucoma<br>(N = 378) |            |         |
|----------------------|----------------------|------------|---------|----------------------------|------------|---------|---------------------|------------|---------|-----------------------|------------|---------|
|                      | Risk Ratio           | 95%<br>CI† | p-value | Risk Ratio                 | 95%<br>CI† | p-value | Risk Ratio          | 95%<br>CI† | p-value | Risk Ratio            | 95%<br>CI† | p-value |
| Years in Practice    |                      |            |         |                            |            |         |                     |            |         |                       |            |         |
| <10 years            | Reference            |            |         | Reference                  |            |         | Reference           |            |         | Reference             |            |         |
| 10-20 years          | 0.97                 | 0.50-1.89  | 0.94    | 1.30                       | 0.75-2.25  | 0.35    | 0.96                | 0.56-1.63  | 0.87    | 1.24                  | 0.70-2.21  | 0.46    |
| 20-30 years          | 1.00                 | 0.52-1.95  | 1.00    | 1.64                       | 0.95-2.82  | 0.08    | 0.91                | 0.52-1.59  | 0.74    | 1.48                  | 0.85-2.59  | 0.17    |
| >30 years            | 1.16                 | 0.44-3.08  | 0.77    | 1.36                       | 0.70-2.66  | 0.37    | 1.29                | 0.71-2.34  | 0.40    | 1.13                  | 0.50-2.56  | 0.78    |
| Gender               |                      |            |         |                            |            |         |                     |            |         |                       |            |         |
| Female               | Reference            |            |         | Reference                  |            |         | Reference           |            |         | Reference             |            |         |
| Male                 | 5.31                 | 0.73-38.60 | 0.10    | 1.73                       | 0.94-3.21  | 0.08    | 1.46                | 0.74-2.84  | 0.27    | 1.19                  | 0.68-2.06  | 0.54    |
| Region               |                      |            |         |                            |            |         |                     |            |         |                       |            |         |
| Northwest            | Reference            |            |         | Reference                  |            |         | Reference           |            |         | Reference             |            |         |
| South                | 0.23                 | 0.11-0.52  | 0.00*** | 0.96                       | 0.53-1.75  | 0.90    | 1.19                | 0.64-2.21  | 0.58    | 0.65                  | 0.37-1.15  | 0.14    |
| Midwest              | 0.68                 | 0.34-1.36  | 0.28    | 1.41                       | 0.75-2.66  | 0.29    | 0.77                | 0.36-1.63  | 0.49    | 0.82                  | 0.43-1.54  | 0.53    |
| West                 | 0.56                 | 0.27-1.17  | 0.12    | 1.21                       | 0.65-2.27  | 0.55    | 1.07                | 0.51-2.24  | 0.85    | 0.58                  | 0.29-1.16  | 0.12    |
| Rurality             |                      |            |         |                            |            |         |                     |            |         |                       |            |         |
| Metro                | Reference            |            |         | Reference                  |            |         | Reference           |            |         | Reference             |            |         |
| Non-Metro            | (empty)              |            |         | 0.18                       | 0.03-1.30  | 0.09    | 0.92                | 0.22-3.78  | 0.91    | 0.51                  | 0.12-2.07  | 0.34    |
| Hospital Affiliation |                      |            |         |                            |            |         |                     |            |         |                       |            |         |
| No                   | Reference            |            |         | Reference                  |            |         | Reference           |            |         | Reference             |            |         |
| Yes                  | 0.67                 | 0.39-1.16  | 0.15    | 0.84                       | 0.54-1.32  | 0.45    | 1.02                | 0.64-1.61  | 0.94    | 0.88                  | 0.56-1.37  | 0.56    |

† 95% confidence interval

\* p&lt;0.05, \*\* p&lt;0.01, \*\*\* p&lt;0.001

Supplemental Table 3: Factors predicting the performance of conjunctival procedures, eyelid surgery, chalazion excision, and blepharoplasty surgeries among comprehensive ophthalmologists (N=7726)

|                      | Conjunctival procedures |           |         | Eyelid laceration repair |           |         | Chalazion excision |           |         | Ptosis/blepharoplasties |           |         |
|----------------------|-------------------------|-----------|---------|--------------------------|-----------|---------|--------------------|-----------|---------|-------------------------|-----------|---------|
|                      | Risk Ratio              | 95% CI†   | p-value | Risk Ratio               | 95% CI†   | p-value | Risk Ratio         | 95% CI†   | p-value | Risk Ratio              | 95% CI†   | p-value |
| Years in Practice    |                         |           |         |                          |           |         |                    |           |         |                         |           |         |
| <10 years            | Reference               |           |         | Reference                |           |         | Reference          |           |         | Reference               |           |         |
| 10-20 years          | 0.75                    | 0.51-1.09 | 0.13    | 1.07                     | 0.39-2.97 | 0.89    | 1.25               | 0.78-2.02 | 0.35    | 0.97                    | 0.78-1.21 | 0.78    |
| 20-30 years          | 0.99                    | 0.70-1.40 | 0.97    | 1.54                     | 0.60-3.99 | 0.37    | 1.47               | 0.93-2.32 | 0.10    | 0.87                    | 0.70-1.10 | 0.24    |
| >30 years            | 0.88                    | 0.59-1.31 | 0.52    | 0.97                     | 0.30-3.15 | 0.96    | 1.50               | 0.91-2.48 | 0.11    | 0.77                    | 0.59-1.02 | 0.07    |
| Gender               |                         |           |         |                          |           |         |                    |           |         |                         |           |         |
| Female               | Reference               |           |         | Reference                |           |         | Reference          |           |         | Reference               |           |         |
| Male                 | 1.75                    | 1.21-2.54 | 0.00**  | 1.00                     | 0.42-2.37 | 1.00    | 1.61               | 1.02-2.53 | 0.04*   | 0.88                    | 0.72-1.07 | 0.21    |
| Region               |                         |           |         |                          |           |         |                    |           |         |                         |           |         |
| Northwest            | Reference               |           |         | Reference                |           |         | Reference          |           |         | Reference               |           |         |
| South                | 0.99                    | 0.70-1.40 | 0.95    | 1.36                     | 0.55-3.40 | 0.51    | 0.94               | 0.65-1.37 | 0.75    | 2.13                    | 1.64-2.77 | 0.00*** |
| Midwest              | 0.88                    | 0.59-1.33 | 0.55    | 0.47                     | 0.12-1.83 | 0.28    | 0.44               | 0.26-0.75 | 0.00**  | 1.48                    | 1.10-1.99 | 0.01**  |
| West                 | 1.15                    | 0.79-1.68 | 0.46    | 1.23                     | 0.44-3.42 | 0.69    | 0.65               | 0.40-1.04 | 0.07    | 2.15                    | 1.63-2.86 | 0.00*** |
| Rurality             |                         |           |         |                          |           |         |                    |           |         |                         |           |         |
| Metro                | Reference               |           |         | Reference                |           |         | Reference          |           |         | Reference               |           |         |
| Non-Metro            | 0.58                    | 0.33-1.02 | 0.06    | 0.69                     | 0.16-2.95 | 0.62    | 0.95               | 0.54-1.66 | 0.86    | 1.18                    | 0.91-1.53 | 0.22    |
| Hospital Affiliation |                         |           |         |                          |           |         |                    |           |         |                         |           |         |
| No                   | Reference               |           |         | Reference                |           |         | Reference          |           |         | Reference               |           |         |
| Yes                  | 1.00                    | 0.77-1.31 | 1.00    | 0.90                     | 0.44-1.84 | 0.78    | 1.00               | 0.73-1.38 | 0.99    | 1.44                    | 1.20-1.71 | 0.00*** |

† 95% confidence interval

\* p&lt;0.05, \*\* p&lt;0.01, \*\*\* p&lt;0.001
